# Supplementary figures and images for: The Effects of Endoplasmic Reticulum Stress via Intratracheal Instillation of Water-Soluble Acrylic Acid Polymer on the Lungs of Rats
Source: MDPI journal article supplement (doi:10.3390/ijms25073573), 2024-03-22

Supplementary Figure S1

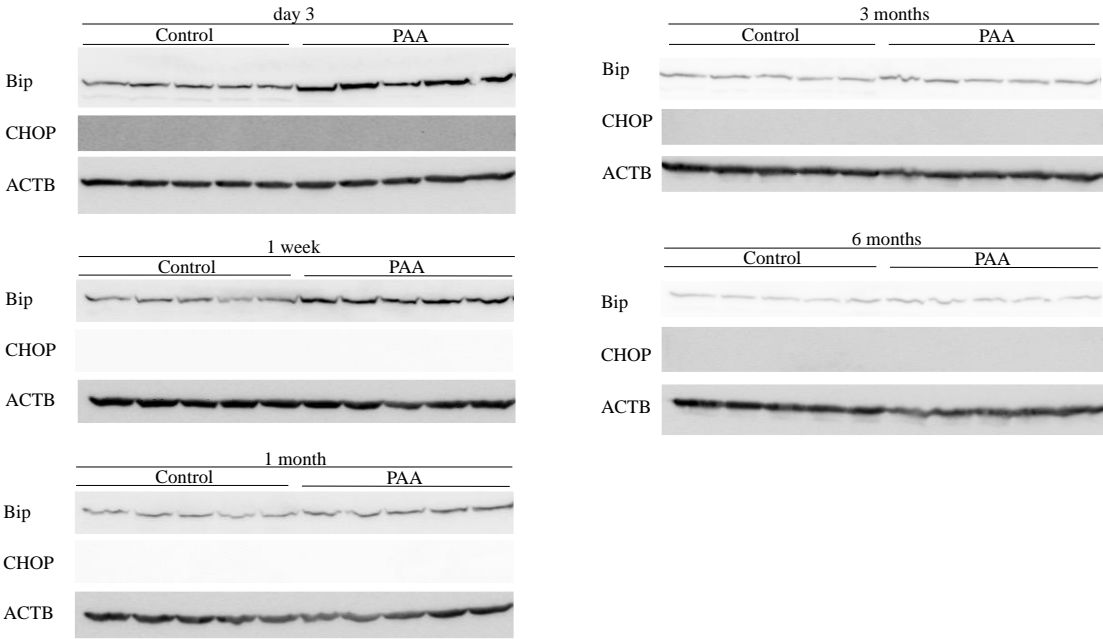

Supplement: s1 [file s1]
